# Supplementary material
Source: MDPI journal article supplement (https://www.mdpi.com/2073-4344/13/3/499)
Supplement: s1 [file s1]

## Supplementary Information

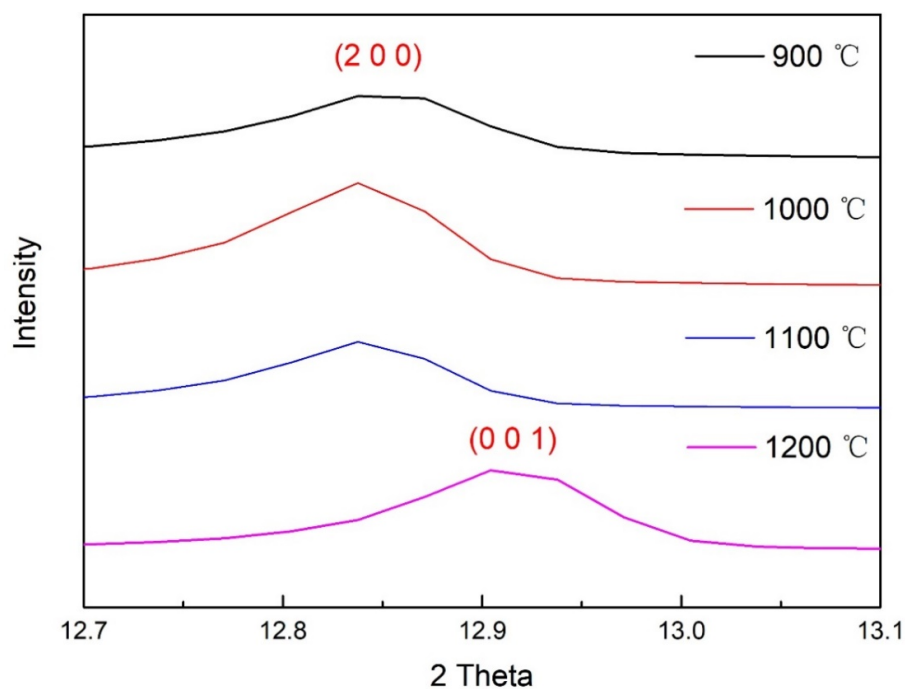

**Figure S1.** XRD patterns of MoO<sub>3</sub>/MoS<sub>2</sub>@G-900, MoO<sub>3</sub>/MoS<sub>2</sub>@G-1000, MoO<sub>3</sub>/MoS<sub>2</sub>@G-1100 and MoO<sub>3</sub>/MoS<sub>2</sub>@G-1200 around the (2 0 0) reflection of orthorhombic MoO<sub>3</sub>, and the (0 0 1) reflection of monoclinic MoO<sub>3</sub>.

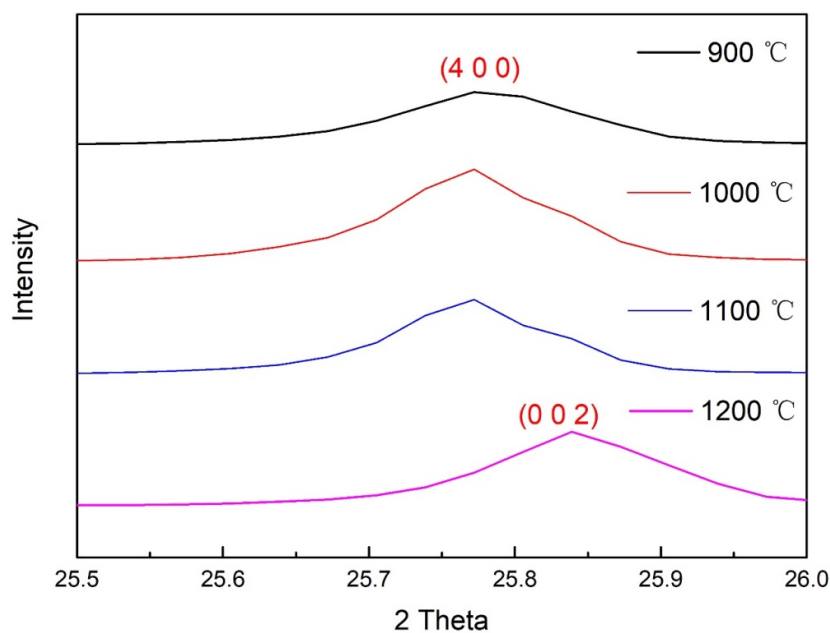

**Figure S2.** XRD pattern of MoO<sub>3</sub>/MoS<sub>2</sub>@G-900, MoO<sub>3</sub>/MoS<sub>2</sub>@G-1000, MoO<sub>3</sub>/MoS<sub>2</sub>@G-1100 and MoO<sub>3</sub>/MoS<sub>2</sub>@G-1200, around the (4 0 0) reflection of orthorhombic MoO<sub>3</sub>, and the (0 0 2) reflection of monoclinic MoO<sub>3</sub>.

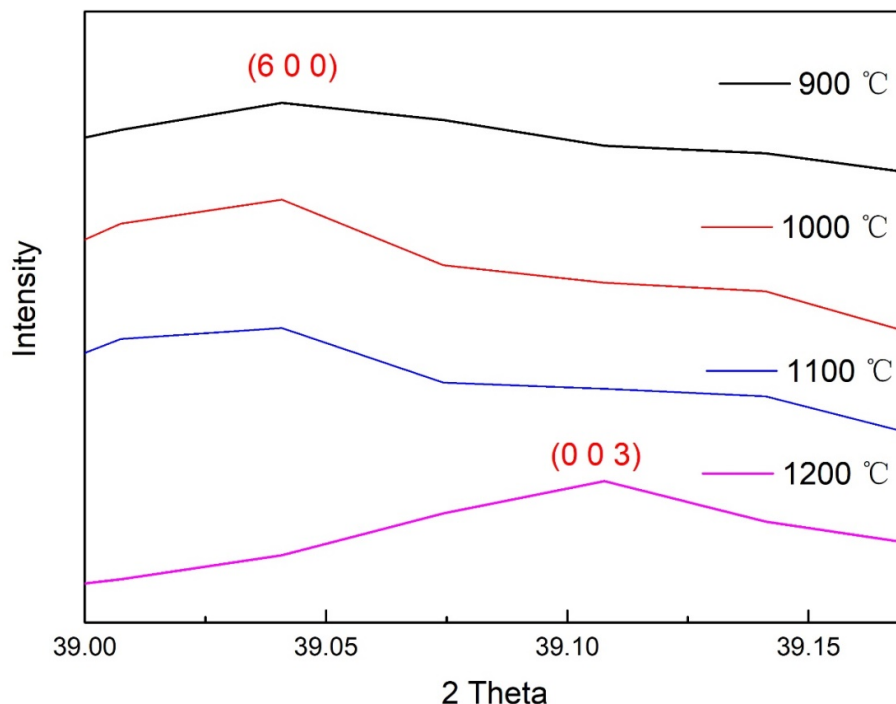

**Figure S3.** XRD patterns of MoO<sub>3</sub>/MoS<sub>2</sub>@G-900, MoO<sub>3</sub>/MoS<sub>2</sub>@G-1000, MoO<sub>3</sub>/MoS<sub>2</sub>@G-1100 and MoO<sub>3</sub>/MoS<sub>2</sub>@G-1200, around the (6 0 0) reflection of orthorhombic MoO<sub>3</sub>, and the (0 0 3) reflection of monoclinic MoO<sub>3</sub>.

**Table S1.** XRD peak intensity ratio corresponding to various peaks in MoO<sub>3</sub>/MoS<sub>2</sub>@G-900, MoO<sub>3</sub>/MoS<sub>2</sub>@G-1000, MoO<sub>3</sub>/MoS<sub>2</sub>@G-1100 and MoO<sub>3</sub>/MoS<sub>2</sub>@G-1200.

|                                            | Orthorhombic $\alpha$ -<br>MoO <sub>3</sub> (200)/ MoS <sub>2</sub><br>(002) | Orthorhombic $\alpha$ -<br>MoO <sub>3</sub> (400)/C<br>(002)  | Orthorhombic $\alpha$ -<br>MoO <sub>3</sub> (600)/ MoS <sub>2</sub><br>(103) |
|--------------------------------------------|------------------------------------------------------------------------------|---------------------------------------------------------------|------------------------------------------------------------------------------|
| MoO <sub>3</sub> /MoS <sub>2</sub> @G-900  | 1.34                                                                         | 1.04                                                          | 6.37                                                                         |
| MoO <sub>3</sub> /MoS <sub>2</sub> @G-1000 | 2.56                                                                         | 1.42                                                          | 7.81                                                                         |
| MoO <sub>3</sub> /MoS <sub>2</sub> @G-1100 | 3.30                                                                         | 1.92                                                          | 8.27                                                                         |
|                                            | Monoclinic $\beta$ - MoO <sub>3</sub><br>(0,0,1)/ MoS <sub>2</sub> (0,0,2)   | Monoclinic $\beta$ -<br>MoO <sub>3</sub> (0,0,2)/C<br>(0,0,2) | Monoclinic $\beta$ - MoO <sub>3</sub><br>(0,0,3)/ MoS <sub>2</sub> (1,0,3)   |
| MoO <sub>3</sub> /MoS <sub>2</sub> @G-1200 | 1.02                                                                         | 1.03                                                          | 4.99                                                                         |

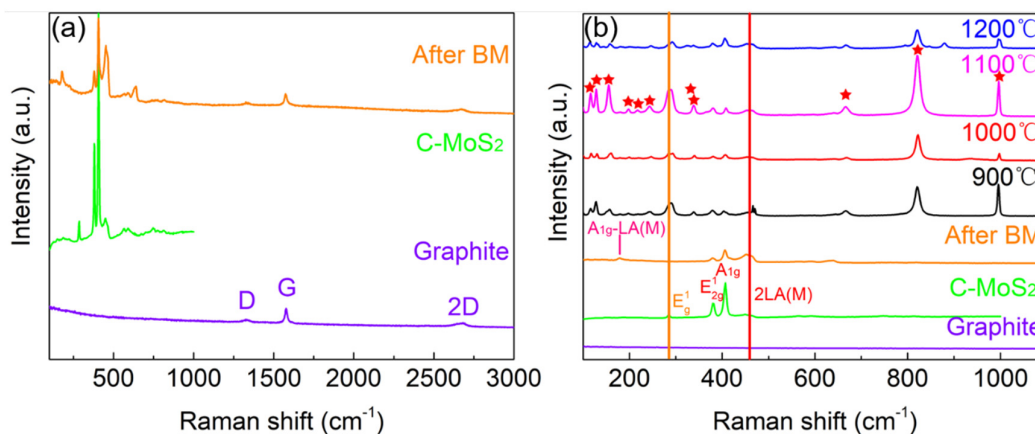

**Figure S4.** Raman spectra of various precursor materials and products obtained at various temperatures.

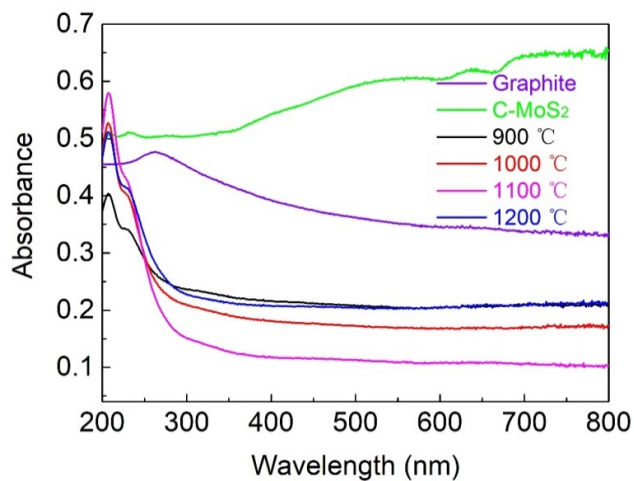

**Figure S5.** UV-vis spectra of various precursor materials and products obtained at various temperatures.

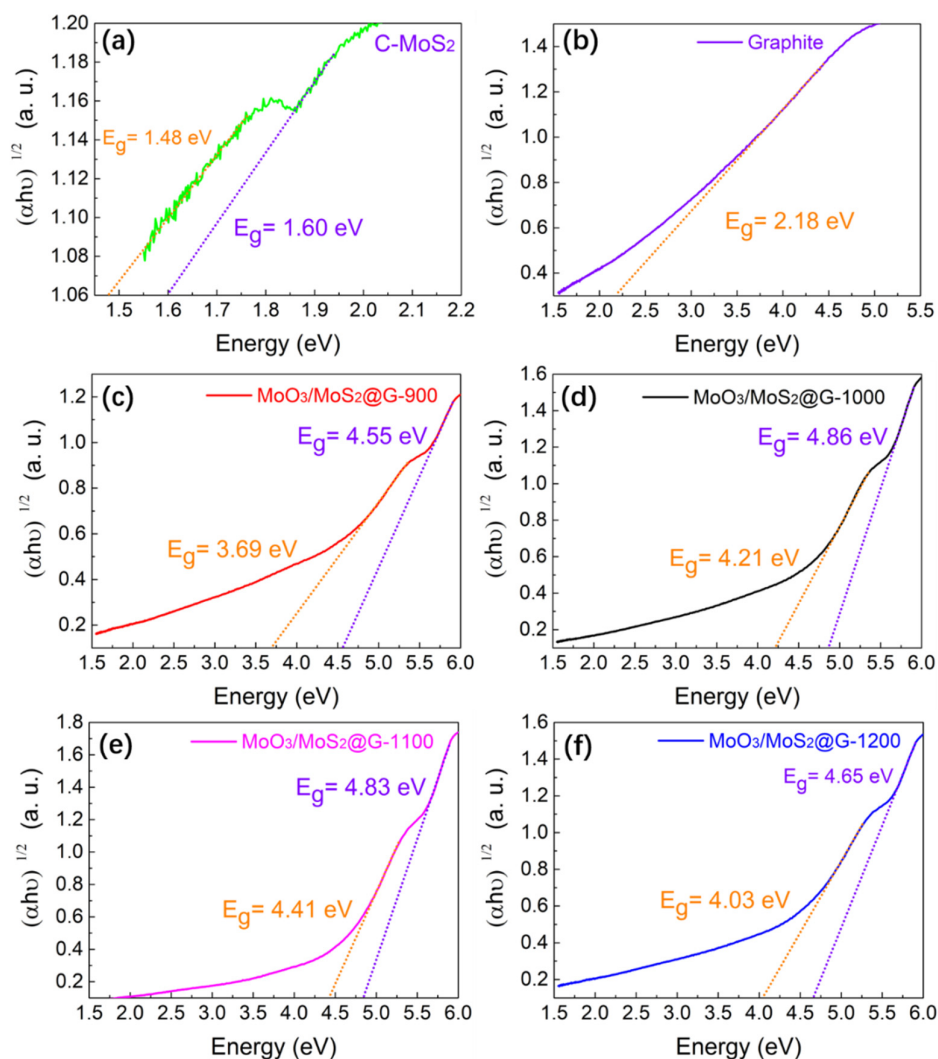

**Figure S6.**  $(\alpha h\nu)^{1/2}$  versus  $h\nu$  plots according to UV-vis spectra of various precursor materials and products obtained at various temperatures.

**Table S2.** Band gap values of various precursor materials and products obtained at various temperatures.

| Sample             | Eg1 (eV) | Eg2 (eV) |
|--------------------|----------|----------|
| C-MoS <sub>2</sub> | 1.48     | 1.60     |
| Graphite           | 2.18     |          |
| 900 °C             | 3.69     | 4.55     |
| 1000 °C            | 4.21     | 4.86     |
| 1100 °C            | 4.41     | 4.83     |
| 1200 °C            | 4.03     | 4.65     |

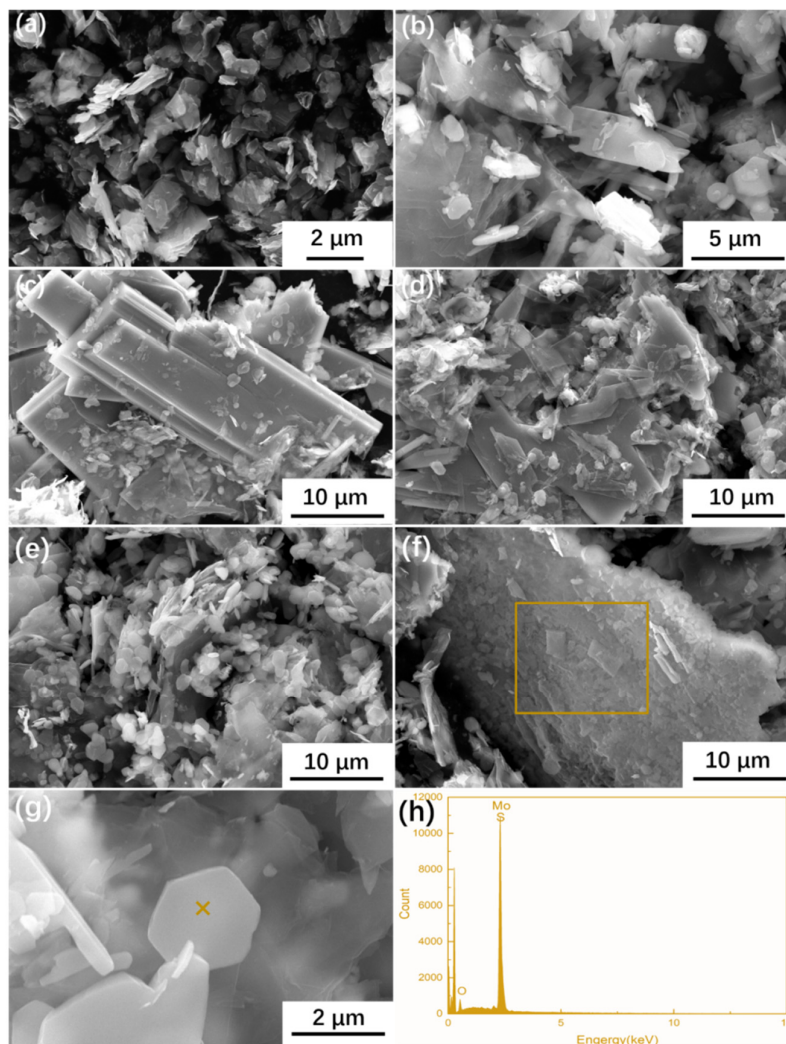

**Figure S7.** SEM image of (a) commercial MoS<sub>2</sub> and the samples prepared at (b) 900, (c) 1000, (d) 1100, and (e-f) 1200 °C. (g) High magnification image taken on the sample prepared at 1200 °C, and (h) the EDS analysis recorded on hexagonal MoS<sub>2</sub> shown in (g).

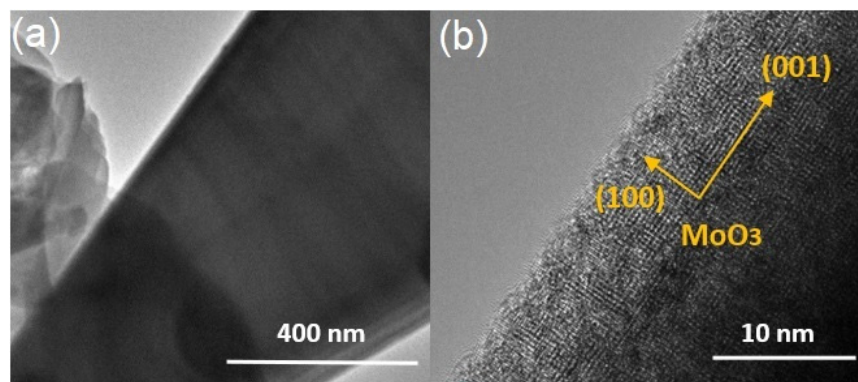

**Figure S8.** TEM micrographs of rod-like  $\text{MoO}_3$  observed in  $\text{MoO}_3/\text{MoS}_2@\text{G}-900$ .

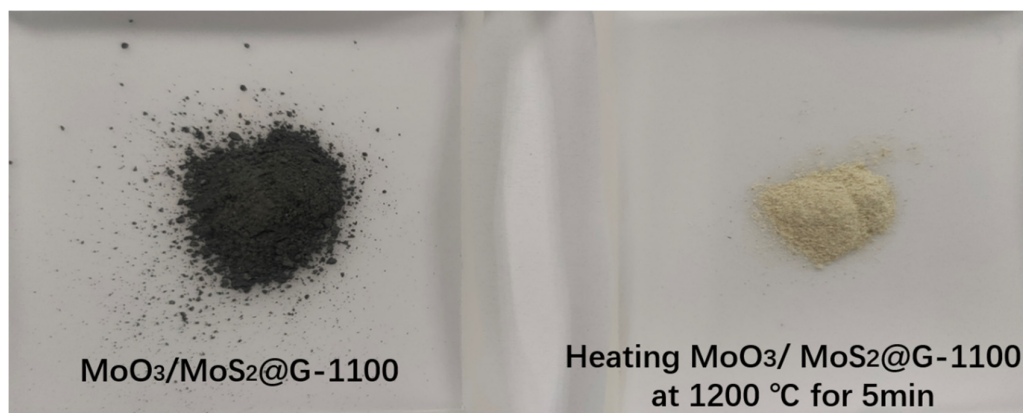

**Figure S9.** Appearance of  $\text{MoO}_3/\text{MoS}_2@\text{G}-1100$ , the same sample after heating at  $1200\text{ }^\circ\text{C}$  for 5 min.

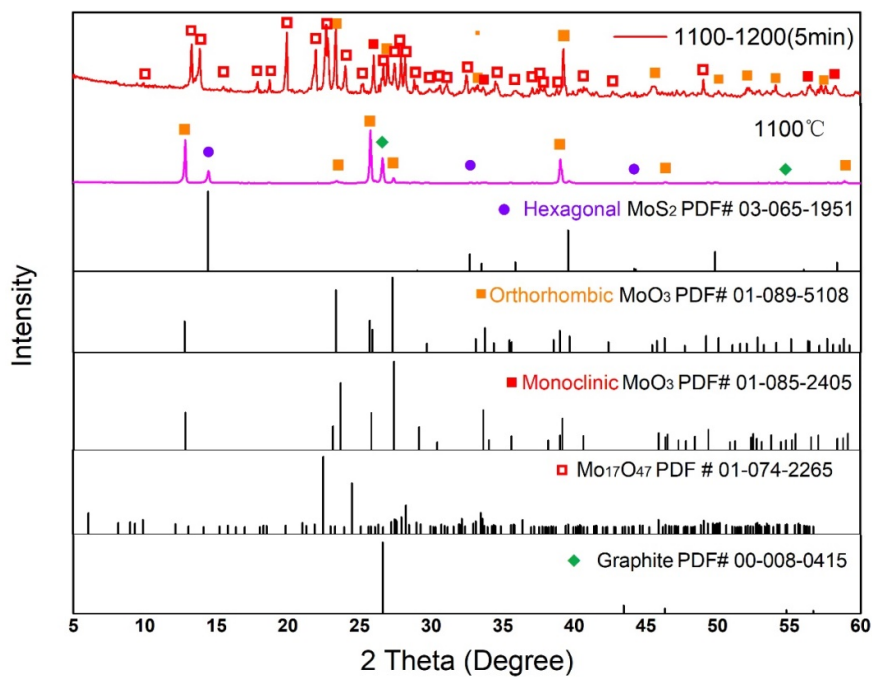

**Figure S10.** XRD patterns of  $\text{MoO}_3/\text{MoS}_2@\text{G}-1100$  and the sample obtained by heating of  $\text{MoO}_3/\text{MoS}_2@\text{G}-1100$  at  $1200\text{ }^\circ\text{C}$  for 5 min.

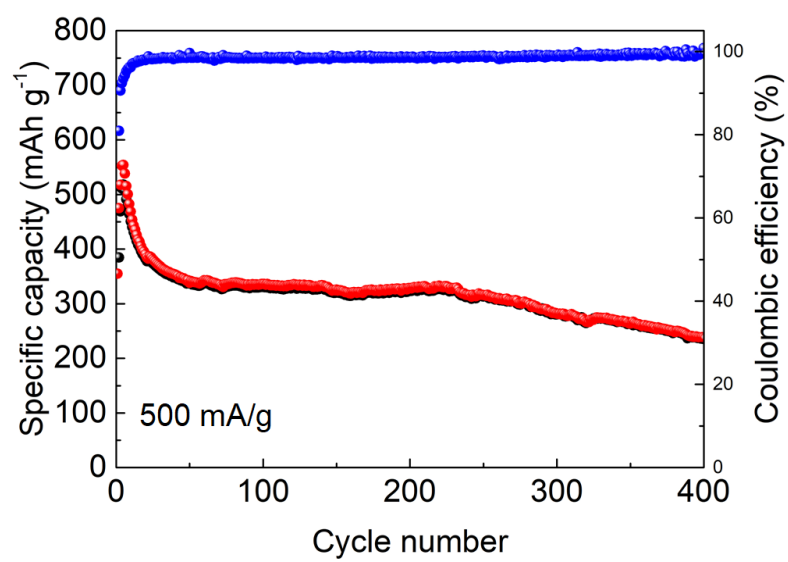

**Figure S11.** Cycling performance of MoO<sub>3</sub>/MoS<sub>2</sub>@G-1100 at 500 mA g<sup>-1</sup>.



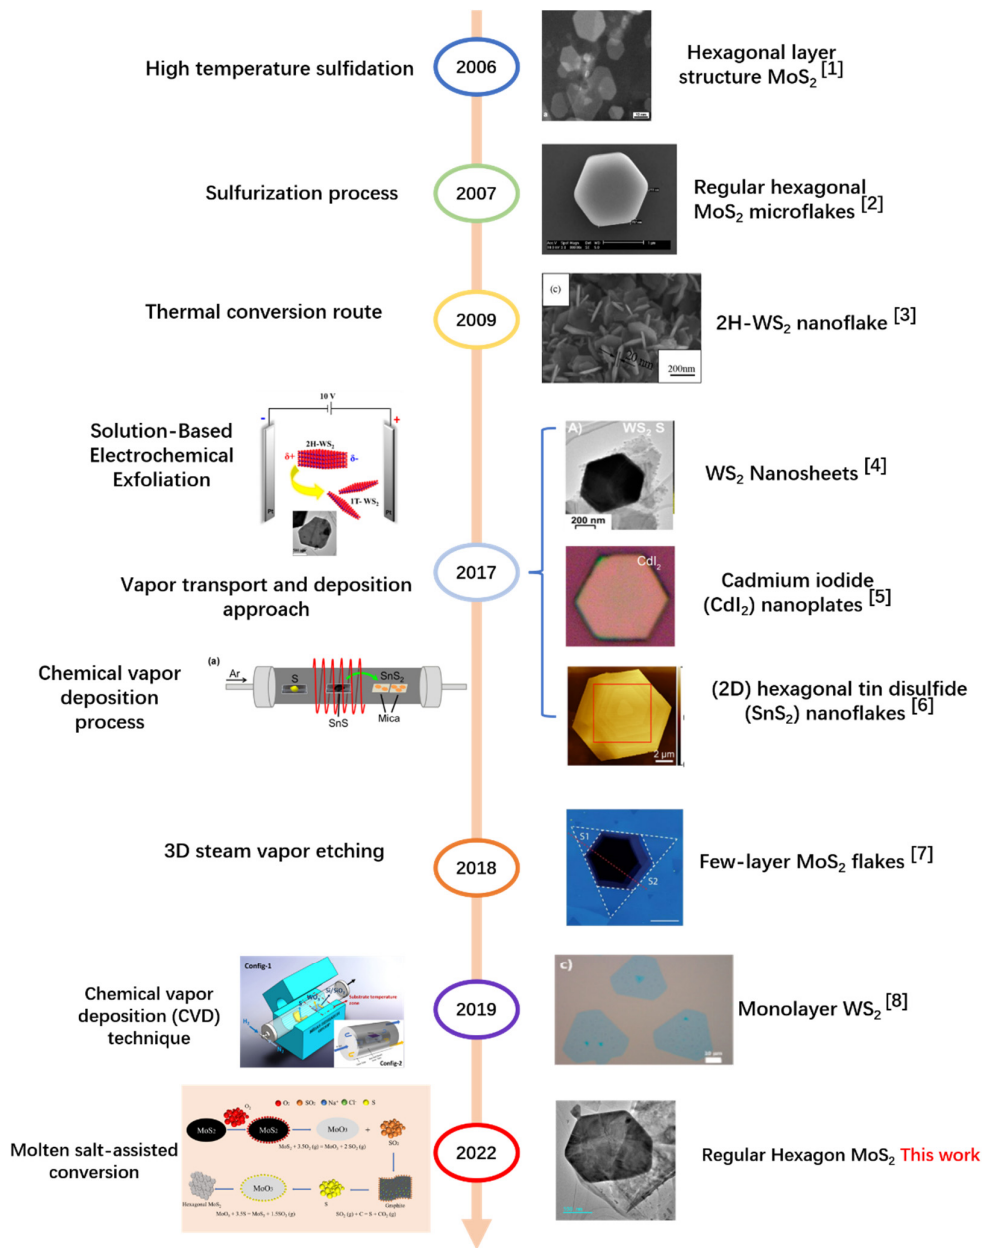

**Figure S12.** Summary of methods proposed for the preparation of hexagonally-shaped nanocrystals extracted from the literature.

**Table S3.** A comparison between precursor materials and the methods used for the preparation of hexagonal crystals extracted from the literature, with those produced in the current study.

| Hexagonal crystal                               | Precursor materials                                                         | Preparation process                                   |
|-------------------------------------------------|-----------------------------------------------------------------------------|-------------------------------------------------------|
| Hexagonal layer structure MoS <sub>2</sub> [31] | (NH <sub>4</sub> ) <sub>2</sub> MoS <sub>4</sub> , Ni(acetate) <sub>2</sub> | Sulfidation at 800 °C (6 h)                           |
| Hexagonal MoS <sub>2</sub> microflakes [32]     | Pure Mo, S                                                                  | Sulfurization at 750 °C (8 h),<br>350-110°C ( 4–10 h) |
| 2H-WS <sub>2</sub> nanoflake [33]               | Tungsten oxide rod, S                                                       | Thermal treatment at 750 °C<br>(4 h)                  |
| WS <sub>2</sub> nanosheets [34]                 | WS <sub>2</sub> , Na <sub>2</sub> SO <sub>4</sub>                           | Electrochemical exfoliation (48 h)                    |
| CdI <sub>2</sub> nanoplates [35]                | WS <sub>2</sub> , SiO <sub>2</sub> /Si substrate, Ar                        | Vapor transport/deposition at<br>320 °C (40 min)      |
| Hexagonal SnS <sub>2</sub> nanoflakes [36]      | SnS, Ar                                                                     | CVD at 200–550°C                                      |

|                                                     |                                                      |                                                             |
|-----------------------------------------------------|------------------------------------------------------|-------------------------------------------------------------|
| (36 min)                                            |                                                      |                                                             |
| Few-layer MoS <sub>2</sub> flakes [77]              | Si/SiO <sub>2</sub> substrate, MoS <sub>2</sub> , Ar | Mechanical exfoliation and steam etching at 700 °C (30 min) |
| Monolayer WS <sub>2</sub> [78]                      | WO <sub>3</sub> , Si/SiO <sub>2</sub> substrate, Ar  | CVD at 100–180 °C                                           |
| Hexagonal MoS <sub>2</sub> nanocrystals [This work] | MoS <sub>2</sub> , natural graphite, NaCl            | Molten salt-assisted conversion at 1100°C (20 min)          |
